# Supplementary material for: Allospecific Tregs Expanded After Anergization Remain Suppressive in Inflammatory Conditions but Lack Expression of Gut-homing Molecules
Source: PubMed Central journal article supplement (PMC4923329; doi:10.1038/mt.2016.64), 2016-05-03
Supplement: mt201664x1.pdf [file mt201664x1.pdf]

## Supplementary Material

### Figure S1

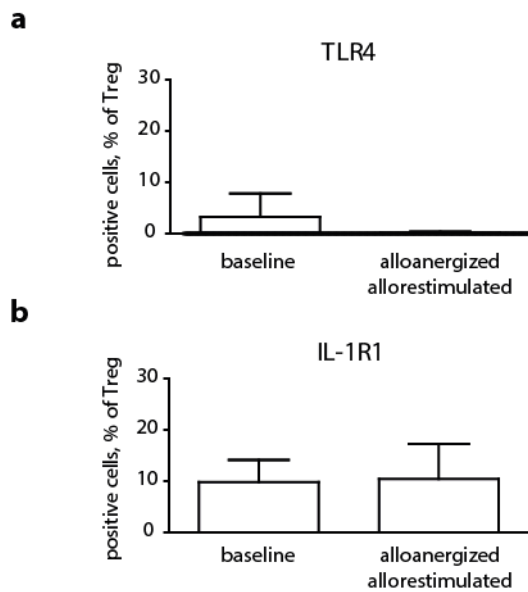

**Figure S1 Expression of TLR4 and IL-1R1 on Treg.** Mean (+/-sd) frequencies of TLR4 and IL-1R1<sup>+</sup> cells expressed as percentage of CD4<sup>+</sup> Treg at baseline, and after alloantigenization and allorestimulation are shown. Results are shown for 3 HLA-mismatched stimulator- responder pairs.

### Figure S2

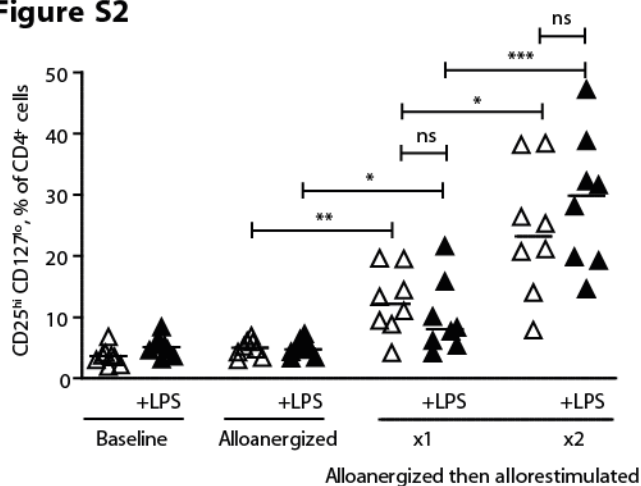

**Figure S2: Expansion of CD25<sup>hi</sup>CD127<sup>lo</sup> CD4<sup>+</sup> Treg after alloantigenization is maintained in lipopolysaccharide (LPS)-rich conditions**

CD25<sup>hi</sup>CD127<sup>lo</sup> Treg, expressed as percentage of total CD4<sup>+</sup> cells, after alloanergization and repeat exposure to alloantigen increase in the absence or presence of LPS. Graph depicts results from 8 different HLA-mismatched stimulator-responder pairs. *P* values are for two-tailed student's *t* test. Horizontal lines are medians. \*, *p*<0.05, \*\* *p*<0.01, ns, not significant

**Figure S3**

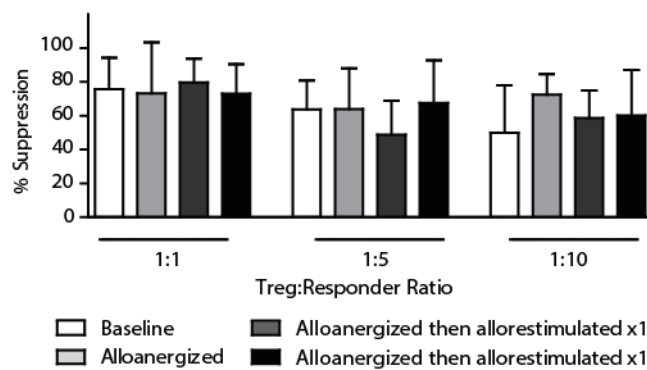

**Figure S3: Treg expanded after alloanergization remain allosuppressive in the presence of IL-1 $\beta$  and IL-6**

Allosuppressive capacity of CD4<sup>+</sup> Treg after alloanergization and subsequent allorestimulation of donor PBMCs in the presence of IL-1 $\beta$  and IL-6. Mean percentage suppression ( $\pm$  SD) of first-party alloproliferative responses of untreated autologous responder PBMCs by CD4<sup>+</sup> Treg from untreated, alloanergized and allorestimulated alloanergized PBMCs. Data are for 3-6 HLA-mismatched stimulator-responder pairs.

**Figure S4**

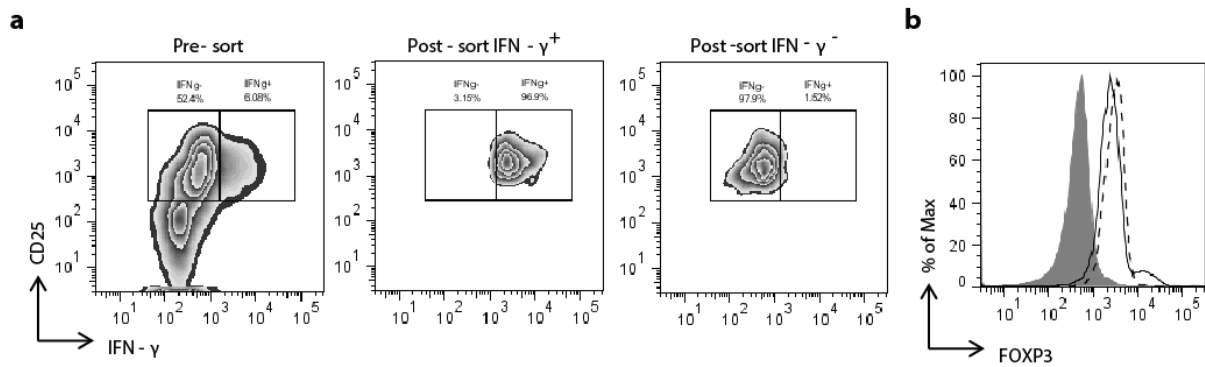

**Figure S4: Gating strategy for the identification and sorting of IFN- $\gamma$ <sup>+</sup> CD4<sup>+</sup> Treg**

a). Bivariate dot plots showing CD25 and IFN- $\gamma$  expression on CD4<sup>+</sup>CD127<sup>lo</sup> cells pre-sort (left panel) and post-FACS sort (middle and right panels) One representative example of four independent experiments is shown.

b) FOXP3 expression in the different subsets. Dashed unfilled histogram denotes CD25<sup>+</sup> IFN- $\gamma$ <sup>+</sup> and solid unfilled histogram denotes CD25<sup>+</sup> IFN- $\gamma$ <sup>neg</sup> cells. Filled histogram is CD25<sup>neg</sup> cells

**Figure S5**

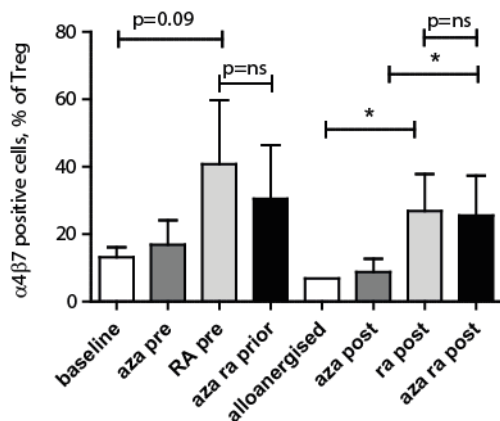

**Figure S5 Expression of  $\alpha$ 4 $\beta$ 7 Treg expanded after alloantigenization after treatment with azacytidine (AZA), retinoic acid (RA) or both. Mean frequencies ( $\pm$**

SD) of cells expressing  $\alpha 4\beta 7$  expressed as a proportion of Treg after alloanergization without and with treatment with AZA, RA or both. \*  $p < 0.05$ , Ns, not significant Ns, not significant. Individual p values where there was a trend to statistical significance ( $p > 0.05 < 0.10$ ) are also shown.

**Figure S6**

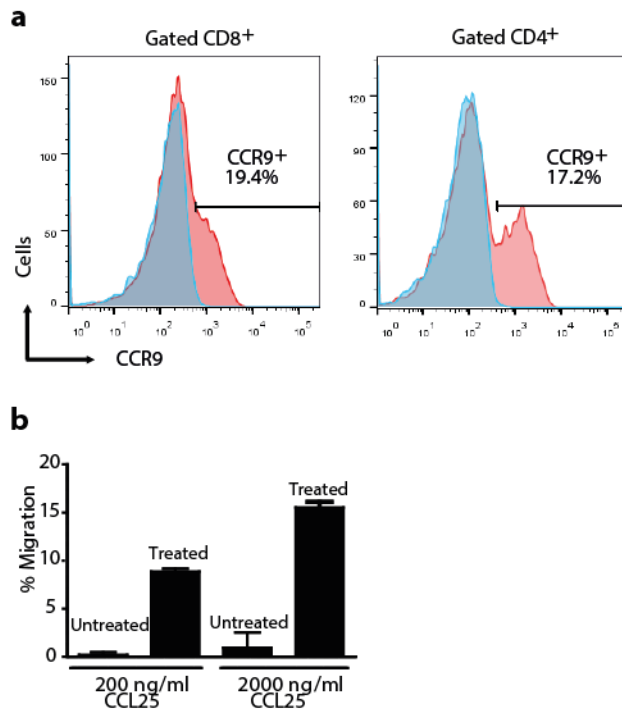

**Figure S6: CCL25-specific chemotaxis control**

A) Representative histograms showing expression of CCR9 on CD4<sup>+</sup> and CD8<sup>+</sup> T-cells subsets after activation of healthy donor PBMCs with CD3/CD28 beads and IL-2 in the presence (red histograms) or absence (blue histograms) of ATRA for 7 days). Representative data from one of three different donors.

B) CCL25 -specific chemotaxis of ATRA treated or untreated healthy donor PBMCs for 7 days in the presence of CD3/CD28 beads and IL-2. Bar charts combine data from 3 different stimulator-responder pairs. Mean percent chemotaxis ( $\pm$  SD) was calculated after subtraction of background migration.

**Table S1: Flow cytometry antibodies****Table S1**

| Target | Fluorochrome  | Clone     | Manufacturer    |
|--------|---------------|-----------|-----------------|
| CD4    | FITC          | M-T466    | Miltenyi Biotec |
| CD4    | ALEXAFLUOR700 | RPA-T4    | Biolegend       |
| CD4    | PE            | M-T466    | Miltenyi Biotec |
| CD8    | APC           | SK1       | Biolegend       |
| CD25   | APC           | 4E3       | Miltenyi Biotec |
| CD39   | FITC          | A1        | Biolegend       |
| CD127  | PE            | MB15-18C9 | Miltenyi Biotec |
| CD49d  | PE-Cy5        | 9F10      | Biolegend       |
| CD127  | PACIFIC BLUE  | A019D5    | Biolegend       |
| CD161  | APC           | HP-3G10   | Biolegend       |
| CD62L  | FITC          | DREG-56   | Biolegend       |
| CCR4   | APC           | L291H4    | Biolegend       |
| CCR7   | APC           | G043H7    | Biolegend       |
| CCR9   | APC           | L053E8    | Biolegend       |
| CXCR4  | PE            | 12G5      | Biolegend       |
| CTLA-4 | PE            | 12-1529   | eBioscience     |

|                                     |                 |                 |             |
|-------------------------------------|-----------------|-----------------|-------------|
| <b>FOXP3</b>                        | PE-Cy7          | PCH101          | eBioscience |
| <b>GARP</b>                         | PerCP-eFluor710 | G14D9           | eBioscience |
| <b>GITR</b>                         | FITC            | eBioAITR        | eBioscience |
| <b>IFN-<math>\gamma</math></b>      | FITC            | 4S.B3           | Biolegend   |
| <b>IL-17</b>                        | PE              | BL168           | Biolegend   |
| <b>Integrin <math>\beta</math>7</b> | PE              | FIB504          | Biolegend   |
| <b>T-bet</b>                        | PerCP-Cy5.5     | 4B10            | Biolegend   |
| <b>TGF-<math>\beta</math>/LAP</b>   | PerCP-Cy5.5     | TW4-2F8         | Biolegend   |
| <b>Helios</b>                       | APC             | 22F6            | Biolegend   |
| <b>CD284 (TLR4)</b>                 | APC             | HTA125          | eBioscience |
| <b>IL-1R1</b>                       | ALEXAFLUOR700   | Goat polyclonal | RnD Systems |
